# Supplementary material for: Seeding the aggregation of TDP-43 requires post-fibrillization proteolytic cleavage
Source: PubMed Central journal article supplement (PMC10244175; doi:10.1038/s41593-023-01341-4), 2023-05-29

**Unmodified gels for Main Figure 1:**

Fig. 1B (Batch 2 is shown in the paper)

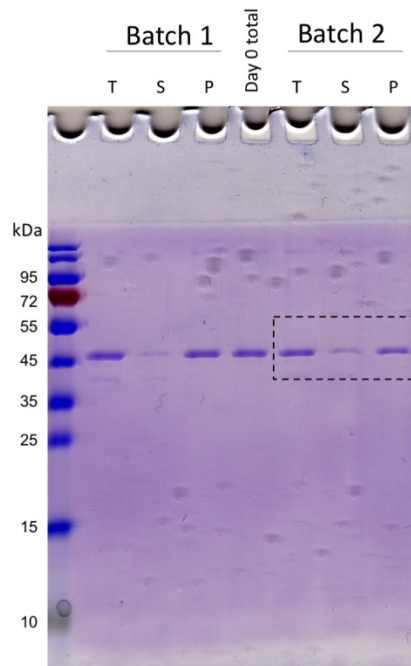

Supplement: 41593_2023_1341_MOESM5_ESM.pdf [file 41593_2023_1341_MOESM5_ESM.pdf]
